# Supplementary material for: Black Nb2O5 nanorods with improved solar absorption and enhanced photocatalytic activity
Source: Royal Society of Chemistry journal article supplement (doi:10.1039/c5dt04578a), 2016-01-01
Supplement: c5dt04578a1.pdf [file c5dt04578a1.pdf]

# Black Nb<sub>2</sub>O<sub>5</sub> Nanorods with Improved Solar Absorption and Enhanced Photocatalytic Activity

*Wenli Zhao<sup>1,2</sup>, Wei Zhao<sup>1</sup>, Guilian Zhu<sup>1</sup>, Tianquan Lin<sup>\*1</sup>, Fangfang Xu<sup>\*2</sup>, Fuqiang Huang<sup>\*1</sup>,*

*3*

<sup>1</sup> CAS Key Laboratory of Materials for Energy Conversion, Shanghai Institute of Ceramics, Chinese Academy of Sciences (CAS), Shanghai 200050, P.R. China;

<sup>2</sup> State Key Laboratory of High Performance Ceramics and Superfine Microstructures, Shanghai Institute of Ceramics, Chinese Academy of Sciences (CAS), Shanghai 200050, P.R. China;

<sup>3</sup> Beijing National Laboratory for Molecular Sciences and State Key Laboratory of Rare Earth Materials Chemistry and Applications, College of Chemistry and Molecular Engineering, Peking University, Beijing 100871, P.R. China.

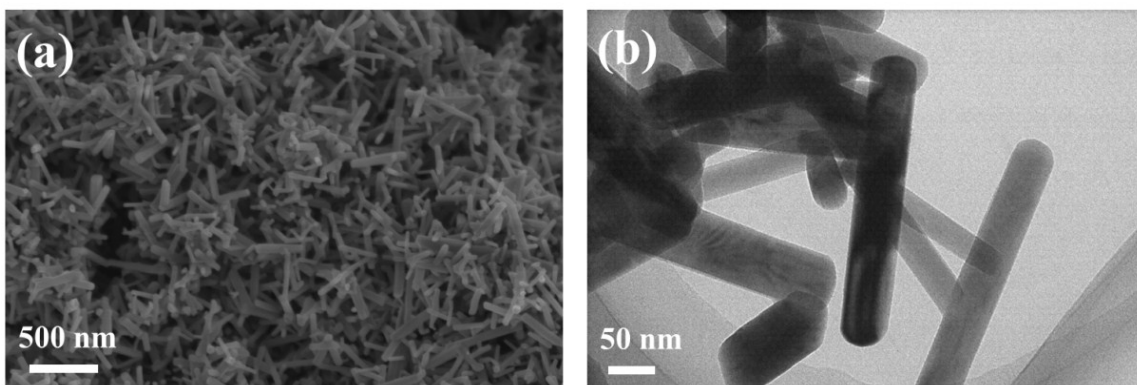

**Figure S1.** (a) SEM image and (b) TEM image of r-Nb<sub>2</sub>O<sub>5</sub> nanorods.

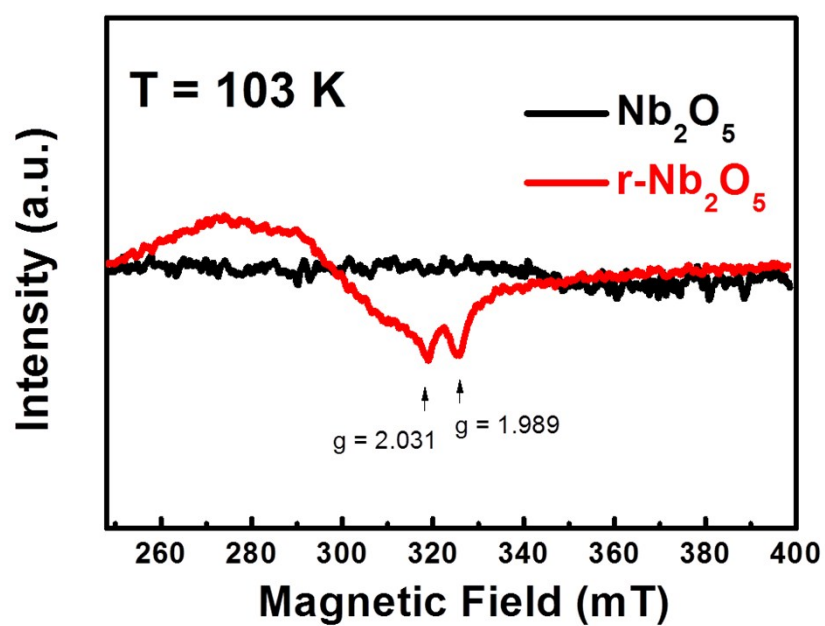

**Figure S2.** EPR spectra of Nb<sub>2</sub>O<sub>5</sub> and r-Nb<sub>2</sub>O<sub>5</sub> measured at 103 K
